# Supplementary material
Source: PubMed Central journal article supplement (PMC7445069)
Supplement: EMS88739-supplement-Supplementary_Material.pdf [file EMS88739-supplement-Supplementary_Material.pdf]

## Supplementary Material

Table S1. Baseline characteristics of urban and rural dwellers commencing a biologic therapy

| S1                               | Baseline characteristics of urban and rural dwellers commencing a biologic therapy |                |             |                |             |                                 |
|----------------------------------|------------------------------------------------------------------------------------|----------------|-------------|----------------|-------------|---------------------------------|
|                                  |                                                                                    | Urban Dwellers |             | Rural Dwellers |             | Difference<br>(rural vs. urban) |
| Demographic characteristics      |                                                                                    |                |             |                |             |                                 |
|                                  |                                                                                    | N.             | mean (SD)   | N.             | mean (SD)   | mean diff (95% CI)              |
| <b>Age*</b>                      | years                                                                              | 309            | 45.5 (13.3) | 110            | 51.1 (13.2) | -5.6 (-8.5, -2.7)               |
| <b>Deprivation*</b>              | 1(most) – 5(least)                                                                 | 310            | 3.0 (1.5)   | 111            | 3.7 (1.1)   | -0.6 (-0.9, -0.3)               |
|                                  |                                                                                    | N.             | %           | N.             | %           | mean % diff (95% CI)            |
| <b>Gender</b>                    | Male                                                                               | 213            | 68.7        | 74             | 66.7        | -2.0 (-19.6, 15.6)              |
| <b>Smoking Status</b>            | Never                                                                              | 128            | 41.6        | 47             | 43.1        | 1.5 (-12.6, 15.6)               |
|                                  | Ex                                                                                 | 102            | 33.1        | 42             | 38.5        | 5.4 (-7.7, 18.5)                |
|                                  | Current                                                                            | 78             | 25.3        | 20             | 18.4        | -6.9 (-16.5, 2.7)               |
| <b>Alcohol</b>                   | Never                                                                              | 29             | 9.4         | 7              | 6.4         | -3.0 (-8.4, 2.4)                |
|                                  | Ex                                                                                 | 54             | 17.5        | 22             | 20.2        | 2.7 (-6.7, 12.1)                |
|                                  | Current                                                                            | 225            | 73.1        | 80             | 73.4        | 0.3 (-18.3, 18.9)               |
| <b>Employed</b>                  | Yes                                                                                | 195            | 63.5        | 68             | 61.3        | 2.2 (-19.2, 14.7)               |
| <b>Job type*</b>                 | Mainly desk/sedentary                                                              | 103            | 54.8        | 22             | 33.3        | -21.5 (-38.8, -4.2)             |
|                                  | Mainly physical/labour intense                                                     | 85             | 45.2        | 44             | 66.7        | 21.5 (-0.2, 43.2)               |
| Clinical characteristics         |                                                                                    |                |             |                |             |                                 |
| <b>HLA B27 status*</b>           | Tested                                                                             | 219            | 70.6        | 85             | 76.6        | 6.0 (-12.7, 24.6)               |
| <b>NSAID</b>                     | Prescribed (last 6m)                                                               | 229            | 74.4        | 87             | 78.4        | 4.0 (-15.0, 23.0)               |
| <b>DMARD</b>                     | Prescribed (last 6m)                                                               | 33             | 15.3        | 14             | 18.2        | 2.9 (-7.7, 13.5)                |
| <b>ESM (history)</b>             | Uveitis present                                                                    | 82             | 26.6        | 22             | 19.8        | -6.8 (-16.6, 3.0)               |
|                                  | Psoriasis present                                                                  | 38             | 12.3        | 10             | 9.0         | -3.3 (-9.8, 3.2)                |
|                                  | IBD present                                                                        | 40             | 13.0        | 11             | 9.9         | -3.1 (-9.9, 3.7)                |
|                                  | Dactylitis present                                                                 | 16             | 5.2         | 8              | 7.2         | 2.0 (-3.2, 7.2)                 |
|                                  | Enthesitis present                                                                 | 41             | 13.3        | 13             | 11.7        | -1.6 (-8.8, 5.6)                |
|                                  | PJD present                                                                        | 74             | 24.0        | 24             | 21.6        | -2.4 (-12.4, 7.6)               |
| Patient reported characteristics |                                                                                    |                |             |                |             |                                 |
|                                  |                                                                                    | N.             | mean (SD)   | N.             | mean (SD)   | mean diff (95% CI)              |
| <b>Referral delay*</b>           | Years†                                                                             | 302            | 7.1 (9.3)   | 108            | 9.7 (11.0)  | -2.6 (-4.7, -0.4)               |
| <b>Disease Activity</b>          | BASDAI: 0 (best) – 10 (worst)                                                      | 307            | 6.4 (2.0)   | 109            | 6.4 (2.0)   | 0.05 (-0.4, 0.5)                |
| <b>Physical Function</b>         | BASFI: 0 (best) – 10 (worst)                                                       | 309            | 6.2 (2.4)   | 111            | 6.3 (2.5)   | -0.03 (-0.5, 0.5)               |
| <b>Spinal Mobility</b>           | BASMI: 0 (best) – 10 (worst)                                                       | 235            | 4.3 (1.8)   | 87             | 4.5 (1.8)   | -0.2 (-0.6, 0.3)                |

|                             |                                |     |             |     |             |                   |
|-----------------------------|--------------------------------|-----|-------------|-----|-------------|-------------------|
| <b>Global Health</b>        | BASG: 0 (best) – 10 (worst)    | 306 | 7.1 (1.8)   | 110 | 7.1 (1.7)   | 0.04 (-0.3, 0.4)  |
| <b>Spinal Pain</b>          | VAS: 0 (best) – 10 (worst)     | 308 | 6.3 (2.4)   | 110 | 6.3 (2.5)   | 0.03 (-0.5, 0.6)  |
| <b>SF12 MCS</b>             | Scored: 0 (worst) – 100 (best) | 297 | 42.6 (11.5) | 110 | 44.2 (11.4) | -1.6 (-4.1, 0.9)  |
| <b>SF12 PCS</b>             | Scored: 0 (worst) – 100 (best) | 297 | 33.0 (10.4) | 110 | 31.8 (10.1) | 1.3 (-1.0, 3.5)   |
| <b>Quality of Life</b>      | ASQoL: 0 (best) – 18 (worst)   | 305 | 11.9 (4.6)  | 110 | 11.8 (4.4)  | 0.1 (-0.9, 1.1)   |
| <b>Anxiety*</b>             | HADS: 0 (best) – 21 (worst)    | 307 | 9.3 (4.5)   | 109 | 8.2 (4.0)   | 1.1 (0.1, 2.1)    |
| <b>Depression</b>           | HADS: 0 (best) – 21 (worst)    | 307 | 7.5 (4.0)   | 109 | 7.4 (4.2)   | 0.7 (-0.8, 1.0)   |
| <b>Sleep Disturbance</b>    | Jenkins: 0 (best) – 20 (worst) | 308 | 12.9 (5.7)  | 111 | 12.8 (6.1)  | 0.1 (-1.3, 1.3)   |
| <b>Fatigue</b>              | CFS: 0 (best) – 11 (worst)     | 310 | 5.6 (3.5)   | 111 | 5.5 (3.9)   | 0.2 (-0.6, 0.9)   |
| <b>Work absenteeism</b>     | %                              | 174 | 10.1 (24.5) | 64  | 13.7 (26.8) | -3.6 (10.8, 3.7)  |
| <b>Work presenteeism</b>    | %                              | 169 | 44.6 (25.7) | 63  | 44.6 (25.8) | -0.05 (-7.5, 7.4) |
| <b>Overall Work impair.</b> | %                              | 165 | 45.8 (26.0) | 61  | 47.7 (27.5) | -1.8 (-9.6, 6.0)  |
| <b>Activity impairment</b>  | %                              | 303 | 60.0 (24.7) | 110 | 58.8 (25.0) | 1.2 (-4.2, 6.6)   |

\* indicate significant difference between urban and rural dwellers ( $p < 0.05$ )

† delay from symptom onset to first referral to specialist clinic

ACR – American college of rheumatology; ASQoL – Ankylosing Spondylitis Quality of Life Index; BASDAI – Bath Ankylosing Spondylitis Disease Activity Index; BASFI – Bath Ankylosing Spondylitis Functional Index; BAS-G - Bath Ankylosing Spondylitis Patient Global Score; BASMI - Bath Ankylosing Spondylitis Metrology Index; CFS – Chalder Fatigue Scale; ESM – extra spinal manifestations; HADS – Hospital Anxiety and Depression Scale; IBD – inflammatory bowel disease; PJD – peripheral joint disease; SF-12 MCS – Short Form 12 Mental Component Score; SF-12 PCS – Short Form 12 Physical Component Score; VAS – visual analogue scale.

Table S2. Interview participant characteristics

| <b>S2</b> | <b>Interview participant characteristics</b>           |                               |
|-----------|--------------------------------------------------------|-------------------------------|
|           | <b>Characteristic</b>                                  | <b>Number of participants</b> |
|           | <b>Age</b>                                             |                               |
|           | 18 – 44                                                | 10                            |
|           | 45 – 64                                                | 13                            |
|           | ≥ 65                                                   | 7                             |
|           | <b>Gender</b>                                          |                               |
|           | Female                                                 | 6                             |
|           | Male                                                   | 24                            |
|           | <b>Location</b>                                        |                               |
|           | Rural                                                  | 18                            |
|           | Urban                                                  | 12                            |
|           | <b>Time since diagnosis</b>                            |                               |
|           | 0 to 4 years                                           | 2                             |
|           | 5 to 10 years                                          | 7                             |
|           | 11 plus                                                | 18                            |
|           | Not specified                                          | 3                             |
|           | <b>ONS Standard Occupational Classification (SOC)</b>  |                               |
|           | Administrative and secretarial                         | 6                             |
|           | Associate professional and technical                   | 2                             |
|           | Caring, leisure and other service occupations          | 2                             |
|           | Elementary e.g. agricultural, construction occupations | 4                             |
|           | Managers, directors and senior officials               | 4                             |
|           | Process, plant and machine operatives                  | 1                             |
|           | Professional occupations                               | 5                             |
|           | Sales and customer services                            | 2                             |
|           | Skilled trades                                         | 4                             |

Supplementary Text: Interview topic guide

---

Opening question: ***“Can you talk me through your experiences of living with ankylosing spondylitis?”***

## **IMPACT OF ANKYLOSING SPONDYLITIS**

### **1. Impact of disease on function and quality of life**

1.1 *How long have you had Ankylosing Spondylitis?*

1.2 *How does Ankylosing Spondylitis affect you?*

1.3 *What are the main problems you have as a result of it? Probe:* Pain, stiffness, fatigue, sleep, reduced mobility, difficulty performing daily activities, and self-confidence.

### **2. Treatment**

2.1 *What treatment are you currently receiving to manage your Ankylosing Spondylitis?*

2.2 *Is the treatment working for you at the moment?*

2.3 *How easy is it for you to access healthcare services?*

## **WORK & WORK ENVIRONMENT**

### **3. Can you talk me through your work/employment history?**

### **4. Current/past work (questions in past tense if not working/unemployed)**

4.1 *Are you currently working (e.g part-time/full time)?*

<FOLLOW- If yes>

4.2 *What job do you do?*

4.3 *What does your job entail?*

4.4 *Can you describe to me a typical day at work?*

4.5 *Do you need to drive as part of your job? If so how often e.g. how many hours per week?*

### **5. Work setting/work environment**

5.1 *How would you describe your work environment?*

**Probe:** large scale/small scale/ established organisational structure vs. small scale setting

5.2 *Roughly, how many people work for your employer/company (if not self-employed)?*

5.3 *What kind of occupational health support does your company provide?*

## 6. Commuting to work

6.1 *How would you describe your commute to work every day? How long does it normally take? **Follow on** Do you drive? Can you park when you get there?*

6.2 *Overall, how are you managing with your daily commute?*

## WORK DISABILITY

### 7. Impact of disease on work performance

7.1 *Does Ankylosing Spondylitis affect you at work?*

**<FOLLOW- If yes>** *Are there any particular aspects of the job/task that you find difficult?*

*What do you struggle the most with at work? **Probe:** pain/fatigue/cognitive symptoms*

7.2 *Have you taken any days off work (sick leave) due to Ankylosing Spondylitis? If yes, how frequent? How many days over the past month?*

7.3 *Have you ever attended work when you have been unwell?*

**<FOLLOW- If yes>** Ask for examples Not just unwell but have got a flare up of AS?

7.4 *How much flexibility do you think you have at work?*

### 8. Relationship with employer

8.1 *Have you discussed your diagnosis with your employer?*

**<FOLLOW- If yes>** *If yes; what was their reaction to this? Was this helpful, if not why not?*

8.2 *Does your employer monitor absence?*

8.3 *Have you had any problems with your employer because of issues related to your Ankylosing Spondylitis e.g. time off work, being unable to do specific jobs/tasks?*

### 9. Adaptations to work

9.1 *Have you changed your job since your diagnosis?*

**<FOLLOW- If yes>** *Why? **Probe:** To avoid certain strenuous tasks, working long hours or jobs that are not flexible and cannot be adjusted to their needs.*

9.2 *Have you had to make any changes/adaptations to your work routine and tasks due to the condition?*

**<FOLLOW- If yes>** *What changes have you made? **Probe:** reduced hours, full-time to part-time, and change in job roles/duties due to health condition.*

9.3 *Do you think Ankylosing Spondylitis has affected your career progression/opportunities? **Probe:** early retirement, passed on promotional opportunity, accepting less demanding roles, and avoid strenuous tasks*

## 10. Coping strategies

10.1 *How else do you manage your condition at work?*

**<FOLLOW>** *Can you give examples of the strategies you use?*

10.2 *What are the most effective strategies you use?*

**<FOLLOW>** *How do they help?*

## SUPPORT

### 11. Provision of support by clinical team

11.1 *Have you talked to a healthcare professional about work worries?*

**<FOLLOW- If no>** *Why not?*

11.2 *Do you find it difficult to get to appointments about your AS or for blood tests?*

11.3 *Do you have to take annual leave for your appointments or can you go in paid work time? Could we make your appointments more convenient in any way?*

11.4 *Have you been offered any support in terms of work issues e.g. occupational advice? Been referred to an OT?*

11.5 *Is there occupational health at your workplace? Have they been involved?*

**<FOLLOW>** *Do you feel that you were supported adequately by the clinical team?*

### 12. Areas for improvement

12.1 *What kind of support would be useful to help you at work?*

**<FOLLOW- If yes>** *Who do you feel is best placed to provide this support?*

12.2 *Is there anything that you would specifically like more information/support with?*

12.2 *How would you like to receive support e.g. face to face meeting with person, via telephone, website, written information leaflets?*

### 13. Communications with work colleagues

13.1 *Are your work colleagues aware of your diagnosis of Ankylosing Spondylitis?*

**<FOLLOW- If yes>** *If yes; what was their reaction to this? Was it helpful for them to know? If not, why not? Probe: Fear of being stigmatised, perceptions of vulnerability.*

13.2 *Do you feel your colleagues understand you condition?*

13.3 *Has Ankylosing Spondylitis affected your relationship with your colleagues?*

## IMPACT ON LIFE

### 14. Impact of work disability on social, family, and financial security

14.1 *Is it important for you to work?*

14.2 *How have work problems (e.g. time off work due to ill-health, unemployment) affected other aspects of your life?*

**Probe:** *family life, social life, finances?*

### 15. Fears and concerns relating to work

15.1 *Do you have concerns about your ability to work, now and in the future?*

**Probe:** concerns - financial security, job security, employability, reduced opportunities, and unpredictability of condition.

**<FOLLOW- If yes>** *Has this affected your mood, for example resulted in anxiety or depression?*

Closing questions:

***Is there anything else you would like to tell me?***

***Are there any questions you thought we would ask that we haven't asked?***
